# Supplementary material for: Combined effects of landscape composition and heterogeneity on farmland avian diversity
Source: PubMed Central journal article supplement (PMC5306015; doi:10.1002/ece3.2693), 2017-01-25
Supplement: ECE3-7-1212-s001.pdf [file ECE3-7-1212-s001.pdf]

**Supplementary material for:**

**Combined effects of landscape composition and heterogeneity on  
farmland avian diversity**

Joana Santana, Luís Reino, Chris Stoate, Francisco Moreira, Paulo Flores Ribeiro, José Lima Santos,  
John T. Rotenberry, Pedro Beja

**Table S1.** Percentage of occurrence of bird species recorded in 73 transects sampled annually during the breeding season in southern Portugal, in 1995-1997 and 2010-2012. Species are classified according to their habitat affinities (F – farmland; S – steppe; W – woodland; O - other), conservation status (SPEC #), and phenology (R – resident, M – migratory).

| Species <sup>1</sup>         | Habitat affinities <sup>2</sup> | Conservation status <sup>3</sup> | Phenology | 1995-1997 | 2010-2012 |
|------------------------------|---------------------------------|----------------------------------|-----------|-----------|-----------|
| <b>Galliformes</b>           |                                 |                                  |           |           |           |
| <i>Alectoris rufa</i>        | F                               | SPEC 2                           | R         | 16.44     | 47.95     |
| <i>Coturnix coturnix</i>     | F, S                            | SPEC 3                           | M         | 54.79     | 52.05     |
| <b>Ciconiiformes</b>         |                                 |                                  |           |           |           |
| <i>Bubulcus ibis</i>         | F                               |                                  | R         | 16.44     | 10.96     |
| <i>Ciconia nigra</i>         | W                               | SPEC 2                           | M         | 1.37      | 0         |
| <b>Accipitriformes</b>       |                                 |                                  |           |           |           |
| <i>Ciconia ciconia</i>       | F                               | SPEC 2                           | R,M       | 15.07     | 32.88     |
| <i>Elanus caeruleus</i>      | F                               | SPEC 3                           | R         | 1.37      | 8.22      |
| <i>Milvus migrans</i>        | F                               | SPEC 3                           | M         | 4.11      | 8.22      |
| <i>Milvus milvus</i>         | F                               | SPEC 2                           | M         | 0         | 2.74      |
| <i>Gyps fulvus</i>           | F                               |                                  | R         | 0         | 1.37      |
| <i>Circaetus gallicus</i>    | W                               | SPEC 3                           | M         | 0         | 4.11      |
| <i>Circus aeruginosus</i>    | O                               |                                  | M         | 0         | 2.74      |
| <i>Circus pygargus</i>       | F, S                            |                                  | M         | 23.29     | 31.51     |
| <i>Buteo buteo</i>           | F                               |                                  | R         | 1.37      | 12.33     |
| <i>Aquila adalberti</i>      | W                               | SPEC 1                           | R         | 0         | 4.11      |
| <i>Aquila pennata</i>        | W                               | SPEC 3                           | M         | 0         | 1.37      |
| <i>Aquila fasciata</i>       | F                               | SPEC 3                           | R         | 0         | 2.74      |
| <i>Falco naumanni</i>        | F, S                            | SPEC 1                           | M         | 1.37      | 27.4      |
| <i>Falco tinnunculus</i>     | F                               | SPEC 3                           | R         | 1.37      | 10.96     |
| <b>Gruiformes</b>            |                                 |                                  |           |           |           |
| <i>Tetrax tetrax</i>         | F, S                            | SPEC 1                           | R         | 54.79     | 56.16     |
| <i>Otis tarda</i>            | F, S                            | SPEC 1                           | R         | 19.18     | 23.29     |
| <b>Charadriiformes</b>       |                                 |                                  |           |           |           |
| <i>Burhinus oedicephalus</i> | F, S                            | SPEC 3                           | R         | 8.22      | 21.92     |
| <i>Glareola pratincola</i>   | F, S                            | SPEC 3                           | M         | 0         | 1.37      |
| <b>Pteroclidiformes</b>      |                                 |                                  |           |           |           |
| <i>Pterocles orientalis</i>  | F, S                            | SPEC 2                           | R         | 0         | 12.33     |
| <b>Columbiformes</b>         |                                 |                                  |           |           |           |
| <i>Columba livia</i>         | F                               |                                  | R         | 0         | 2.74      |
| <i>Columba palumbus</i>      | W                               |                                  | R         | 0         | 12.33     |
| <i>Streptopelia decaocto</i> | F                               |                                  | R         | 0         | 21.92     |
| <i>Streptopelia turtur</i>   | F                               | SPEC 3                           | M         | 0         | 1.37      |
| <i>Clamator glandarius</i>   | F                               |                                  | M         | 1.37      | 8.22      |
| <i>Cuculus canorus</i>       | F                               |                                  | M         | 5.48      | 6.85      |
| <b>Strigiformes</b>          |                                 |                                  |           |           |           |
| <i>Athene noctua</i>         | F                               | SPEC 3                           | R         | 5.48      | 6.85      |

| Species <sup>1</sup>             | Habitat affinities <sup>2</sup> | Conservation status <sup>3</sup> | Phenology | 1995-1997 | 2010-2012 |
|----------------------------------|---------------------------------|----------------------------------|-----------|-----------|-----------|
| <b>Coraciiformes</b>             |                                 |                                  |           |           |           |
| <i>Merops apiaster</i>           | F                               | SPEC 3                           | M         | 12.33     | 52.05     |
| <i>Coracias garrulus</i>         | F, S                            | SPEC 2                           | M         | 0         | 4.11      |
| <b>Piciformes</b>                |                                 |                                  |           |           |           |
| <i>Dendrocopos major</i>         | W                               |                                  | R         | 0         | 1.37      |
| <b>Passeriformes</b>             |                                 |                                  |           |           |           |
| <i>Melanocorypha calandra</i>    | F, S                            | SPEC 3                           | R         | 30.14     | 36.99     |
| <i>Calandrella brachydactyla</i> | F, S                            | SPEC 3                           | M         | 38.36     | 34.25     |
| <i>Galerida spp. *</i>           | F, S                            | SPEC 3                           | R         | 21.92     | 75.34     |
| <i>Lullula arborea</i>           | W                               | SPEC 2                           | R         | 10.96     | 9.59      |
| <i>Hirundo rustica</i>           | F                               | SPEC 3                           | M         | 19.18     | 43.84     |
| <i>Cecropis daurica</i>          | F                               |                                  | M         | 0         | 4.11      |
| <i>Delichon urbicum</i>          | F                               | SPEC 3                           | M         | 0         | 5.48      |
| <i>Anthus campestris</i>         | F, S                            | SPEC 3                           | M         | 4.11      | 20.55     |
| <i>Motacilla flava</i>           | F                               |                                  | M         | 0         | 4.11      |
| <i>Motacilla alba</i>            | F                               |                                  | R         | 1.37      | 1.37      |
| <i>Cercotrichas galactotes</i>   | W                               | SPEC 3                           | M         | 0         | 1.37      |
| <i>Luscinia megarhynchos</i>     | W                               |                                  | M         | 4.11      | 15.07     |
| <i>Saxicola rubicola</i>         | F                               |                                  | R         | 19.18     | 35.62     |
| <i>Oenanthe hispanica</i>        | F, S                            | SPEC 2                           | M         | 13.7      | 21.92     |
| <i>Turdus viscivorus</i>         | W                               |                                  | R         | 0         | 1.37      |
| <i>Turdus merula</i>             | W                               |                                  | R         | 8.22      | 34.25     |
| <i>Upupa epops</i>               | F                               | SPEC 3                           | M         | 24.66     | 26.03     |
| <i>Cettia cetti</i>              | W                               |                                  | R         | 4.11      | 4.11      |
| <i>Cisticola juncidis</i>        | F, S                            |                                  | R         | 65.75     | 80.82     |
| <i>Acrocephalus scirpaceus</i>   | O                               |                                  | M         | 0         | 1.37      |
| <i>Acrocephalus arundinaceus</i> | O                               |                                  | M         | 0         | 1.37      |
| <i>Hippolais polyglotta</i>      | W                               |                                  | M         | 0         | 2.74      |
| <i>Sylvia atricapilla</i>        | W                               |                                  | R         | 0         | 1.37      |
| <i>Sylvia hortensis</i>          | F                               | SPEC 3                           | M         | 0         | 1.37      |
| <i>Sylvia undata</i>             | W                               | SPEC 2                           | R         | 0         | 2.74      |
| <i>Sylvia cantillans</i>         | W                               |                                  | M         | 0         | 2.74      |
| <i>Sylvia melanocephala</i>      | W                               |                                  | R         | 12.33     | 15.07     |
| <i>Phylloscopus ibericus</i>     | W                               |                                  | M         | 0         | 1.37      |
| <i>Phylloscopus collybita</i>    | W                               |                                  | M         | 0         | 1.37      |
| <i>Aegithalos caudatus</i>       | W                               |                                  | R         | 1.37      | 0         |
| <i>Cyanistes caeruleus</i>       | W                               |                                  | R         | 8.22      | 13.7      |
| <i>Parus major</i>               | W                               |                                  | R         | 12.33     | 10.96     |
| <i>Certhia brachydactyla</i>     | W                               |                                  | R         | 2.74      | 8.22      |
| <i>Oriolus oriolus</i>           | W                               |                                  | M         | 0         | 1.37      |
| <i>Lanius meridionalis</i>       | F                               |                                  | R         | 12.33     | 20.55     |
| <i>Lanius senator</i>            | F                               | SPEC 2                           | M         | 15.07     | 8.22      |
| <i>Garrulus glandarius</i>       | W                               |                                  | R         | 0         | 4.11      |
| <i>Cyanopica cyanus</i>          | W                               |                                  | R         | 0         | 21.92     |
| <i>Pica pica</i>                 | F                               |                                  | R         | 0         | 10.96     |

| Species <sup>1</sup>       | Habitat affinities <sup>2</sup> | Conservation status <sup>3</sup> | Phenology | 1995-1997 | 2010-2012 |
|----------------------------|---------------------------------|----------------------------------|-----------|-----------|-----------|
| <i>Corvus monedula</i>     | F                               |                                  | R         | 0         | 2.74      |
| <i>Corvus corone</i>       | F                               |                                  | R         | 0         | 26.03     |
| <i>Corvus corax</i>        | W                               |                                  | R         | 4.11      | 4.11      |
| <i>Sturnus unicolor</i>    | F                               |                                  | R         | 9.59      | 28.77     |
| <i>Passer</i> spp. **      | F                               |                                  | R         | 8.22      | 34.25     |
| <i>Fringila coelebs</i>    | W                               |                                  | R         | 2.74      | 1.37      |
| <i>Serinus serinus</i>     | F                               |                                  | R         | 0         | 4.11      |
| <i>Chloris chloris</i>     | F                               |                                  | R         | 4.11      | 20.55     |
| <i>Carduelis carduelis</i> | F                               |                                  | R         | 5.48      | 49.32     |
| <i>Carduelis cannabina</i> | F                               | SPEC 2                           | R         | 0         | 23.29     |
| <i>Estrilda astrild</i>    | O                               |                                  | R         | 0         | 1.37      |
| <i>Emberiza calandra</i>   | F, S                            | SPEC 2                           | R         | 94.52     | 93.15     |

<sup>1</sup> Species are listed in taxonomic order following [Equipa Atlas \(2008\)](#).

<sup>2</sup> Bird habitat categorizations based on [Ehrlich et al. \(1994\)](#), [Suárez et al. \(1997\)](#), [Equipa Atlas \(2008\)](#), [Reino et al. \(2009\)](#) and [EBCC \(2012\)](#).

<sup>3</sup> Species of European Conservation Concern: SPEC 1 - Species of global conservation concern; SPEC 2 - species concentrated in Europe and with an unfavorable conservation status; SPEC 3 - species not concentrated in Europe but with an unfavorable conservation status ([BirdLife International 2004](#)).

\* *Galerida* spp.: includes *Galerida theklae*, *G. cristata* and *Galerida* sp. observations.

\*\* *Passer* spp.: includes *Passer domesticus*, *P. hispaniolensis* and *Passer* sp. observations. We have not considered *Passer* spp. as a SPEC species because most of the identified records were from *P. hispaniolensis*.

**Table S2.** Description of variables used to quantify landscape compositional and configurational heterogeneity in 250-m buffers around 73 transects used to estimate bird species richness in 1995-1997 and 2010-2012, in southern Portugal.

---

| <b>Landscape variable (unit, abbreviation)</b> | <b>Description</b>                                                                                     |
|------------------------------------------------|--------------------------------------------------------------------------------------------------------|
| <b>Compositional heterogeneity</b>             |                                                                                                        |
| Land cover richness (no., CR)                  | Total number of different natural/production land cover types.                                         |
| Land cover diversity (SHDI) <sup>a</sup>       | Shannon's diversity index computed on the proportion of different natural/production land cover types. |
| Land cover evenness (SHEI) <sup>b</sup>        | Shannon's evenness index computed on the proportion of different natural/production land cover types.  |
| <b>Configurational heterogeneity</b>           |                                                                                                        |
| Largest patch index (% LPI)                    | Percentage of area of the largest natural/production land cover type patch.                            |
| Patch size (ha, AREA)                          | Mean area of natural/production land cover type patches.                                               |
| Edge density (m <sup>2</sup> /ha, ED)          | Density of edges between natural and production land cover type patches.                               |
| Shape complexity (SHAPE)                       | Mean perimeter-to-area ratio of natural/production land cover type patches.                            |

---

<sup>a</sup>SHDI = 0 when the landscape contains only 1 or 0 cover types;

<sup>b</sup>SHEI = 0 when the landscape contains only 1 or 0 cover types. SHEI = 1 when distribution of area among patch types is perfectly even (i.e., proportional abundances are the same).

**Table S3.** Formulation of candidate models ( $g_{1-63}$ ) based on all possible combinations of the six sets of landscape variables listed in [Table 1](#).

| No. variable sets | No. models | Model formulation                                     |
|-------------------|------------|-------------------------------------------------------|
| One set           | 6          | $g_1 = \text{Set 1}$                                  |
|                   |            | $g_2 = \text{Set 2}$                                  |
|                   |            | $g_3 = \text{Set 3}$                                  |
|                   |            | $g_4 = \text{Set 4}$                                  |
|                   |            | $g_5 = \text{Set 5}$                                  |
|                   |            | $g_6 = \text{Set 6}$                                  |
| Two sets          | 15         | $g_7 = \text{Set 1} + \text{Set 2}$                   |
|                   |            | $g_8 = \text{Set 1} + \text{Set 3}$                   |
|                   |            | $g_9 = \text{Set 1} + \text{Set 4}$                   |
|                   |            | $g_{10} = \text{Set 1} + \text{Set 5}$                |
|                   |            | $g_{11} = \text{Set 1} + \text{Set 6}$                |
|                   |            | $g_{12} = \text{Set 2} + \text{Set 3}$                |
|                   |            | $g_{13} = \text{Set 2} + \text{Set 4}$                |
|                   |            | $g_{14} = \text{Set 2} + \text{Set 5}$                |
|                   |            | $g_{15} = \text{Set 2} + \text{Set 6}$                |
|                   |            | $g_{16} = \text{Set 3} + \text{Set 4}$                |
|                   |            | $g_{17} = \text{Set 3} + \text{Set 5}$                |
|                   |            | $g_{18} = \text{Set 3} + \text{Set 6}$                |
|                   |            | $g_{19} = \text{Set 4} + \text{Set 5}$                |
|                   |            | $g_{20} = \text{Set 4} + \text{Set 6}$                |
|                   |            | $g_{21} = \text{Set 5} + \text{Set 6}$                |
| Three sets        | 20         | $g_{22} = \text{Set 1} + \text{Set 2} + \text{Set 3}$ |
|                   |            | $g_{23} = \text{Set 1} + \text{Set 2} + \text{Set 4}$ |
|                   |            | $g_{24} = \text{Set 1} + \text{Set 2} + \text{Set 5}$ |
|                   |            | $g_{25} = \text{Set 1} + \text{Set 2} + \text{Set 6}$ |
|                   |            | $g_{26} = \text{Set 1} + \text{Set 3} + \text{Set 4}$ |
|                   |            | $g_{27} = \text{Set 1} + \text{Set 3} + \text{Set 5}$ |
|                   |            | $g_{28} = \text{Set 1} + \text{Set 3} + \text{Set 6}$ |
|                   |            | $g_{29} = \text{Set 1} + \text{Set 4} + \text{Set 5}$ |
|                   |            | $g_{30} = \text{Set 1} + \text{Set 4} + \text{Set 6}$ |

| No. variable sets | No. models | Model formulation                                                                                  |
|-------------------|------------|----------------------------------------------------------------------------------------------------|
|                   |            | $g_{31} = \text{Set 1} + \text{Set 5} + \text{Set 6}$                                              |
|                   |            | $g_{32} = \text{Set 2} + \text{Set 3} + \text{Set 4}$                                              |
|                   |            | $g_{33} = \text{Set 2} + \text{Set 3} + \text{Set 5}$                                              |
|                   |            | $g_{34} = \text{Set 2} + \text{Set 3} + \text{Set 6}$                                              |
|                   |            | $g_{35} = \text{Set 2} + \text{Set 4} + \text{Set 5}$                                              |
|                   |            | $g_{36} = \text{Set 2} + \text{Set 4} + \text{Set 6}$                                              |
|                   |            | $g_{37} = \text{Set 2} + \text{Set 5} + \text{Set 6}$                                              |
|                   |            | $g_{38} = \text{Set 3} + \text{Set 4} + \text{Set 5}$                                              |
|                   |            | $g_{39} = \text{Set 3} + \text{Set 4} + \text{Set 6}$                                              |
|                   |            | $g_{40} = \text{Set 3} + \text{Set 5} + \text{Set 6}$                                              |
|                   |            | $g_{41} = \text{Set 4} + \text{Set 5} + \text{Set 6}$                                              |
| Four sets         | 15         | $g_{42} = \text{Set 1} + \text{Set 2} + \text{Set 3} + \text{Set 4}$                               |
|                   |            | $g_{43} = \text{Set 1} + \text{Set 2} + \text{Set 3} + \text{Set 5}$                               |
|                   |            | $g_{44} = \text{Set 1} + \text{Set 2} + \text{Set 3} + \text{Set 6}$                               |
|                   |            | $g_{45} = \text{Set 1} + \text{Set 2} + \text{Set 4} + \text{Set 5}$                               |
|                   |            | $g_{46} = \text{Set 1} + \text{Set 2} + \text{Set 4} + \text{Set 6}$                               |
|                   |            | $g_{47} = \text{Set 1} + \text{Set 2} + \text{Set 5} + \text{Set 6}$                               |
|                   |            | $g_{48} = \text{Set 1} + \text{Set 3} + \text{Set 4} + \text{Set 5}$                               |
|                   |            | $g_{49} = \text{Set 1} + \text{Set 3} + \text{Set 4} + \text{Set 6}$                               |
|                   |            | $g_{50} = \text{Set 1} + \text{Set 3} + \text{Set 5} + \text{Set 6}$                               |
|                   |            | $g_{51} = \text{Set 1} + \text{Set 4} + \text{Set 5} + \text{Set 6}$                               |
|                   |            | $g_{52} = \text{Set 2} + \text{Set 3} + \text{Set 4} + \text{Set 5}$                               |
|                   |            | $g_{53} = \text{Set 2} + \text{Set 3} + \text{Set 4} + \text{Set 6}$                               |
|                   |            | $g_{54} = \text{Set 2} + \text{Set 3} + \text{Set 5} + \text{Set 6}$                               |
|                   |            | $g_{55} = \text{Set 2} + \text{Set 4} + \text{Set 5} + \text{Set 6}$                               |
|                   |            | $g_{56} = \text{Set 3} + \text{Set 4} + \text{Set 5} + \text{Set 6}$                               |
| Five sets         | 6          | $g_{57} = \text{Set 1} + \text{Set 2} + \text{Set 3} + \text{Set 4} + \text{Set 5}$                |
|                   |            | $g_{58} = \text{Set 1} + \text{Set 2} + \text{Set 3} + \text{Set 4} + \text{Set 6}$                |
|                   |            | $g_{59} = \text{Set 1} + \text{Set 2} + \text{Set 3} + \text{Set 5} + \text{Set 6}$                |
|                   |            | $g_{60} = \text{Set 1} + \text{Set 2} + \text{Set 4} + \text{Set 5} + \text{Set 6}$                |
|                   |            | $g_{61} = \text{Set 1} + \text{Set 3} + \text{Set 4} + \text{Set 5} + \text{Set 6}$                |
|                   |            | $g_{62} = \text{Set 2} + \text{Set 3} + \text{Set 4} + \text{Set 5} + \text{Set 6}$                |
| Six sets          | 1          | $g_{63} = \text{Set 1} + \text{Set 2} + \text{Set 3} + \text{Set 4} + \text{Set 5} + \text{Set 6}$ |

**Table S4.** Summary of average models relating spatial variation in bird species richness in 1995-1997 to landscape variables. In each case we provide the model-averaged partial standardized coefficients (Coef) and their partial standardized standard error (SE). The relative importance of each variable in the model (Imp) was calculated as the ratio between the respective partial standardized coefficient and the largest standardized coefficient in the model (Cade 2015). Variables are ordered by their relative importance within each model. Variables with Imp > 0.4 are in bold, and the ones with negative effects are underlined. See main text for methodological details.

| Variable set                                    | Landscape variable                      | Coef         | SE          | Imp         |
|-------------------------------------------------|-----------------------------------------|--------------|-------------|-------------|
| <b>All species (<math>R^2 = 0.58</math>)</b>    |                                         |              |             |             |
| <u>Composition/Production</u>                   | <u>Arable land with scattered trees</u> | <u>-0.33</u> | <u>0.06</u> | <u>1.00</u> |
| <u>Composition/Production</u>                   | <u>Irrigated annual crops</u>           | <u>-0.30</u> | <u>0.06</u> | <u>0.91</u> |
| <u>Composition/Production</u>                   | <u>Annual dry crops</u>                 | <u>-0.23</u> | <u>0.05</u> | <u>0.70</u> |
| <u>Composition/Production</u>                   | <u>Permanent pastures</u>               | <u>-0.18</u> | <u>0.05</u> | <u>0.55</u> |
| Compositional heterogeneity/Production          | Cover diversity (Production)            | 0.14         | 0.06        | 0.43        |
| <u>Composition/Production</u>                   | <u>Permanent crops</u>                  | <u>-0.14</u> | <u>0.06</u> | <u>0.42</u> |
| Compositional heterogeneity/Production          | Cover evenness (Production)             | -0.10        | 0.06        | 0.31        |
| Compositional heterogeneity/Production          | Cover richness (Production)             | 0.00         | 0.03        | 0.00        |
| <b>Woodland birds (<math>R^2 = 0.78</math>)</b> |                                         |              |             |             |
| Composition/Natural                             | Open woodland                           | 0.71         | 0.11        | 1.00        |
| Composition/Natural                             | Woodland                                | 0.43         | 0.07        | 0.61        |
| Composition/Natural                             | Water bodies                            | -0.08        | 0.15        | 0.11        |
| Composition/Natural                             | Streams                                 | 0.04         | 0.08        | 0.06        |
| Composition/Natural                             | Shrubland                               | 0.03         | 0.08        | 0.04        |
| <b>Farmland birds (<math>R^2 = 0.39</math>)</b> |                                         |              |             |             |
| <u>Composition/Production</u>                   | <u>Arable land with scattered trees</u> | <u>-0.24</u> | <u>0.07</u> | <u>1.00</u> |
| <u>Composition/Production</u>                   | <u>Annual irrigated crops</u>           | <u>-0.17</u> | <u>0.07</u> | <u>0.72</u> |
| Compositional heterogeneity/Production          | Cover diversity (Production)            | 0.09         | 0.07        | 0.37        |
| Compositional heterogeneity/Production          | Cover evenness (Production)             | -0.06        | 0.07        | 0.23        |
| Composition/Production                          | Permanent crops                         | -0.04        | 0.06        | 0.18        |
| Composition/Production                          | Dry annual crops                        | -0.03        | 0.05        | 0.12        |
| Composition/Production                          | Permanent pastures                      | 0.01         | 0.03        | 0.02        |
| Compositional heterogeneity/Production          | Cover richness (Production)             | -0.01        | 0.04        | 0.02        |
| <b>Steppe birds (<math>R^2 = 0.31</math>)</b>   |                                         |              |             |             |
| Composition/Production                          | Permanent pastures                      | 0.19         | 0.07        | 1.00        |
| Composition/Production                          | Annual dry crops                        | 0.19         | 0.06        | 0.99        |
| Composition/Production                          | Arable land with scattered trees        | -0.03        | 0.06        | 0.15        |
| Composition/Production                          | Annual irrigated crops                  | 0.01         | 0.04        | 0.06        |
| Composition/Production                          | Permanent crops                         | 0.01         | 0.04        | 0.06        |



**Table S5.** Summary of average models relating spatial variation in bird species richness in 2010-2012 to landscape variables. In each case we provide the model-averaged partial standardized coefficients (Coef) and their partial standardized standard error (SE). The relative importance of each variable in the model (Imp) was calculated as the ratio between the respective partial standardized coefficient and the largest standardized coefficient in the model (Cade 2015). Variables are ordered by their relative importance within each model. Variables with Imp > 0.4 are in bold, and the ones with negative effects are underlined. See main text for methodological details.

| Variable set                                    | Landscape variable                | Coef         | SE          | Imp         |
|-------------------------------------------------|-----------------------------------|--------------|-------------|-------------|
| <b>All species (<math>R^2 = 0.38</math>)</b>    |                                   |              |             |             |
| <b>Composition/Natural</b>                      | <b>Streams</b>                    | <b>0.08</b>  | <b>0.04</b> | <b>1.00</b> |
| <u>Configurational heterogeneity/Natural</u>    | <u>Shape complexity (Natural)</u> | <u>-0.05</u> | <u>0.05</u> | <u>0.61</u> |
| <b>Configurational heterogeneity/Natural</b>    | <b>Patch size (Natural)</b>       | <b>0.04</b>  | <b>0.04</b> | <b>0.44</b> |
| Configurational heterogeneity/Natural           | Large patch index (Natural)       | 0.03         | 0.04        | 0.33        |
| Composition/Natural                             | Woodland                          | 0.02         | 0.03        | 0.28        |
| Composition/Natural                             | Open woodland                     | -0.02        | 0.04        | 0.27        |
| Composition/Natural                             | Shrubland                         | 0.02         | 0.03        | 0.22        |
| Configurational heterogeneity/Natural           | Edge density (Natural)            | 0.01         | 0.03        | 0.07        |
| Composition/Natural                             | Water bodies                      | 0.00         | 0.02        | 0.03        |
| <b>Woodland (<math>R^2 = 0.76</math>)</b>       |                                   |              |             |             |
| <u>Composition/Production</u>                   | <u>Permanent pastures</u>         | <u>-0.66</u> | <u>0.26</u> | <u>1.00</u> |
| <u>Composition/Production</u>                   | <u>Annual dry crops</u>           | <u>-0.40</u> | <u>0.21</u> | <u>0.61</u> |
| Configurational heterogeneity/Natural           | Patch size (Natural)              | 0.26         | 0.11        | 0.39        |
| Composition/Natural                             | Woodland                          | 0.17         | 0.11        | 0.26        |
| Composition/Natural                             | Shrubland                         | 0.16         | 0.11        | 0.24        |
| Composition/Natural                             | Water bodies                      | -0.12        | 0.11        | 0.18        |
| Composition/Natural                             | Open woodland                     | -0.10        | 0.10        | 0.15        |
| Composition/Natural                             | Streams                           | 0.07         | 0.10        | 0.11        |
| Composition/production                          | Arable land with scattered trees  | 0.05         | 0.09        | 0.08        |
| Composition/production                          | Permanent crops                   | 0.05         | 0.15        | 0.07        |
| Configurational heterogeneity/Natural           | Large patch index (Natural)       | 0.02         | 0.08        | 0.03        |
| Composition/Production                          | Annual irrigated crops            | -0.01        | 0.09        | 0.02        |
| Configurational heterogeneity/Natural           | Shape complexity (Natural)        | 0.01         | 0.06        | 0.02        |
| Configurational heterogeneity/Natural           | Edge density (Natural)            | 0.01         | 0.06        | 0.01        |
| <b>Farmland (<math>R^2 = 0.15</math>)</b>       |                                   |              |             |             |
| <b>Configurational heterogeneity/Production</b> | <b>Production edge density</b>    | <b>0.09</b>  | <b>0.05</b> | <b>1.00</b> |
| Configurational heterogeneity/Production        | Mean production shape complexity  | 0.00         | 0.02        | 0.03        |
| Configurational heterogeneity/Production        | Largest production patch index    | 0.00         | 0.02        | 0.03        |
| Configurational heterogeneity/Production        | Mean patch area                   | 0.00         | 0.02        | 0.03        |
| <b>Steppe (<math>R^2 = 0.29</math>)</b>         |                                   |              |             |             |
| <b>Composition/Production</b>                   | <b>Permanent pastures</b>         | <b>0.17</b>  | <b>0.06</b> | <b>1.00</b> |
| <b>Composition/Production</b>                   | <b>Annual dry crops</b>           | <b>0.14</b>  | <b>0.06</b> | <b>0.79</b> |
| Composition/Production                          | Annual irrigated crops            | 0.03         | 0.05        | 0.16        |
| Composition/Production                          | Arable land with scattered trees  | 0.02         | 0.04        | 0.14        |
| Composition/Production                          | Permanent crops                   | 0.00         | 0.04        | 0.01        |

**Table S6.** Summary of average models relating temporal variation in bird species richness to landscape variables. In each case we provide the model-averaged partial standardized coefficients (Coef) and their partial standardized standard error (SE). The relative importance of each variable in the model (Imp) was calculated as the ratio between the respective partial standardized coefficient and the largest standardized coefficient in the model (Cade 2015). Variables are ordered by their relative importance within each model. Variables with Imp > 0.4 are in bold, and the ones with negative effects are underlined. See main text for methodological details.

| Variable set                                 | Landscape variable                      | Coef         | SE          | Imp         |
|----------------------------------------------|-----------------------------------------|--------------|-------------|-------------|
| <b>All species (<math>R^2 = 0.17</math>)</b> |                                         |              |             |             |
| <b>Composition/production</b>                | <b>Permanent crops</b>                  | <b>1.06</b>  | <b>0.67</b> | <b>1.00</b> |
| <u>Composition/production</u>                | <u>Arable land with scattered trees</u> | <u>-0.65</u> | <u>0.63</u> | <u>0.61</u> |
| Composition/production                       | Permanent pastures                      | -0.09        | 0.35        | 0.09        |
| Composition/production                       | Annual dry crops                        | 0.06         | 0.35        | 0.06        |
| Composition/production                       | Annual irrigated crops                  | 0.02         | 0.30        | 0.02        |
| <b>Woodland (<math>R^2 = 0.25</math>)</b>    |                                         |              |             |             |
| <b>Composition/production</b>                | <b>Permanent crops</b>                  | <b>0.62</b>  | <b>0.26</b> | <b>1.00</b> |
| Composition/production                       | Permanent pastures                      | -0.13        | 0.21        | 0.21        |
| Composition/production                       | Arable land with scattered trees        | -0.08        | 0.15        | 0.13        |
| Composition/production                       | Annual dry crops                        | 0.05         | 0.20        | 0.08        |
| Composition/production                       | Annual irrigated crops                  | -0.03        | 0.14        | 0.05        |
| <b>Farmland (<math>R^2 = 0.05</math>)</b>    |                                         |              |             |             |
| <b>Compositional heterogeneity/Natural</b>   | <b>Cover evenness (Natural)</b>         | <b>0.56</b>  | <b>0.56</b> | <b>1.00</b> |
| Compositional heterogeneity/Natural          | Cover diversity (Natural)               | 0.09         | 0.41        | 0.17        |
| Compositional heterogeneity/Natural          | Cover richness (Natural)                | 0.00         | 0.25        | 0.00        |
| <b>Steppe (<math>R^2 = 0.12</math>)</b>      |                                         |              |             |             |
| <b>Compositional heterogeneity/Natural</b>   | <b>Cover richness (Natural)</b>         | <b>0.37</b>  | <b>0.35</b> | <b>1.00</b> |
| <b>Compositional heterogeneity/Natural</b>   | <b>Cover evenness (Natural)</b>         | <b>0.28</b>  | <b>0.33</b> | <b>0.75</b> |
| Compositional heterogeneity/Natural          | Cover diversity (Natural)               | 0.03         | 0.24        | 0.07        |

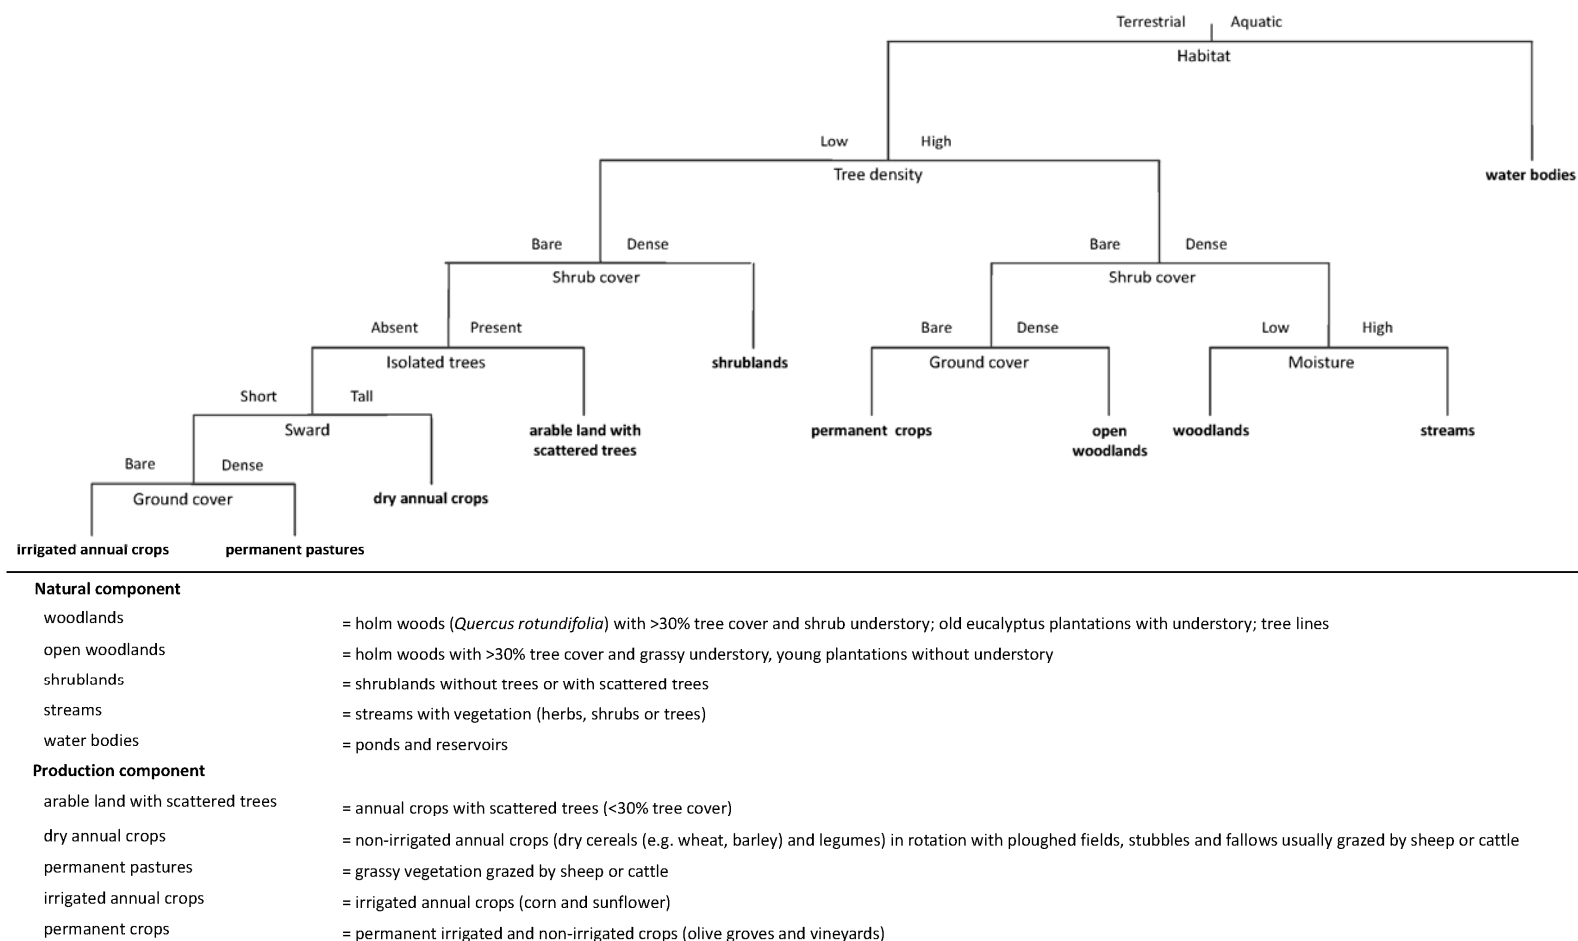

**Figure S1.** Classification tree of land cover categories used to model the relations between bird species richness and landscape characteristics in southern Portugal. Categories were defined considering the main nesting and foraging habitats of bird species in the study area (Moreira 1999; Delgado & Moreira 2000; Stoate et al. 2000; Reino et al. 2009, 2010), and assuming that habitat preferences are often influenced strongly by structural characteristics (e.g. tree density, shrub cover, sward density and height, and amount of bare ground – ground cover). Characteristics of the herbaceous sward were considered during the sampling months (April-May), though they are known to vary strongly during the annual cycle (e.g., dry annual crops are sown in autumn and thus the sward is tall and dense during the breeding season, whereas irrigated annual crops are generally sown in spring, and so during the breeding season the sward tends to be short, sparse, and with a high proportion of bare ground).

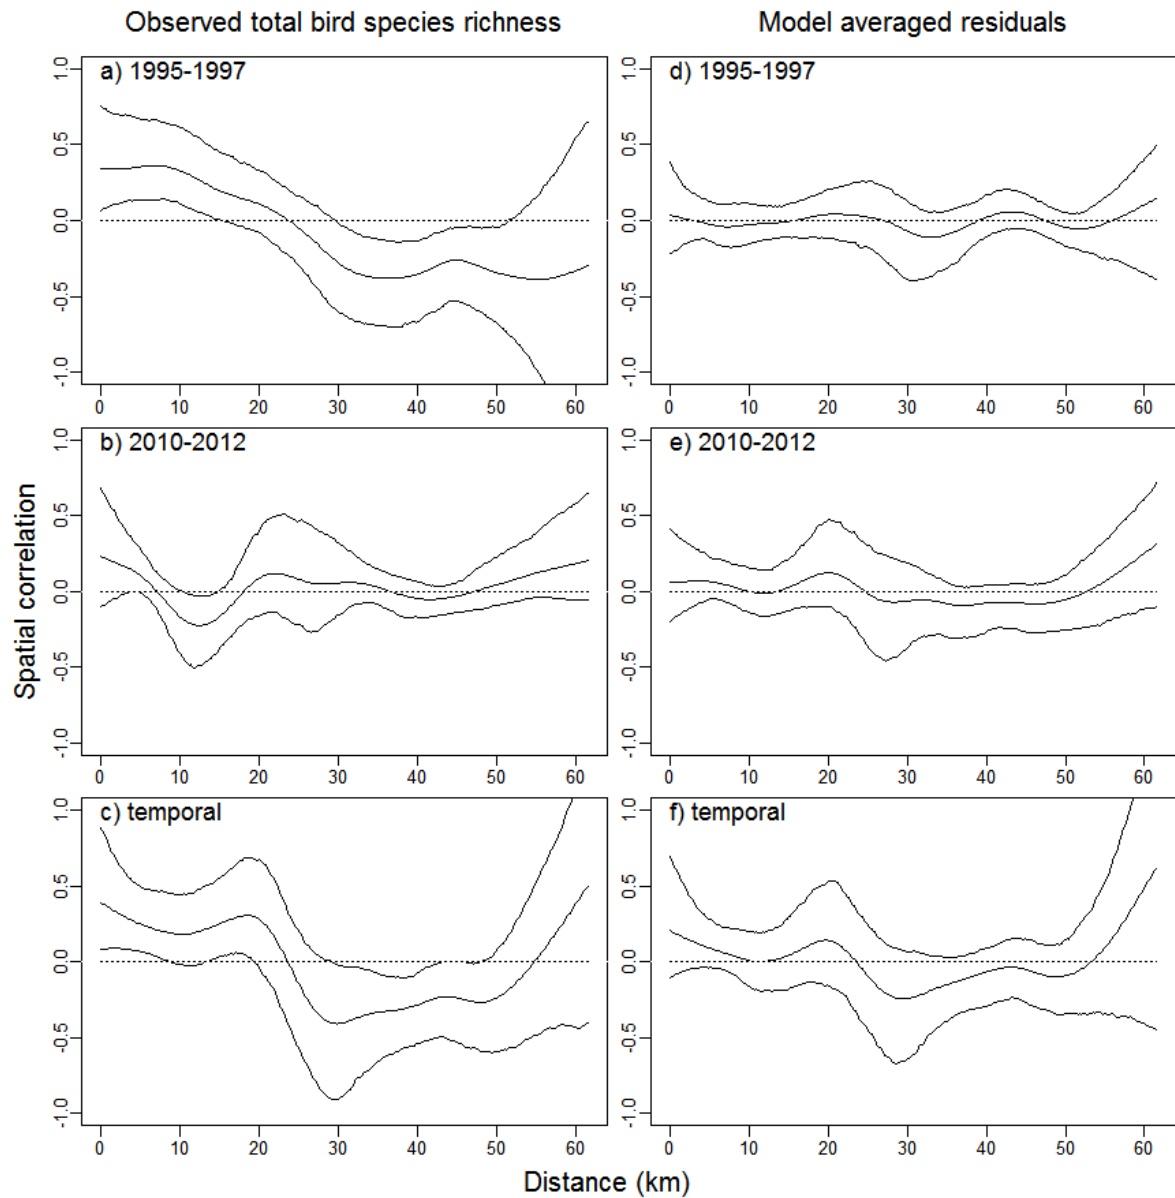

**Figure S2.** Spline correlograms describing spatial autocorrelation for total bird species richness and for the residuals of models relating species richness to landscape variables (Tables S4 – S6). Separate correlograms are presented for 1995-97 (a, d), 2010-12 (b, e), and temporal variation (c, f). Lines represent the estimate (in the middle) and the 95% confidence envelopes (external lines) using 1000 bootstrap resamples (Bjørnstad & Falck 2001).

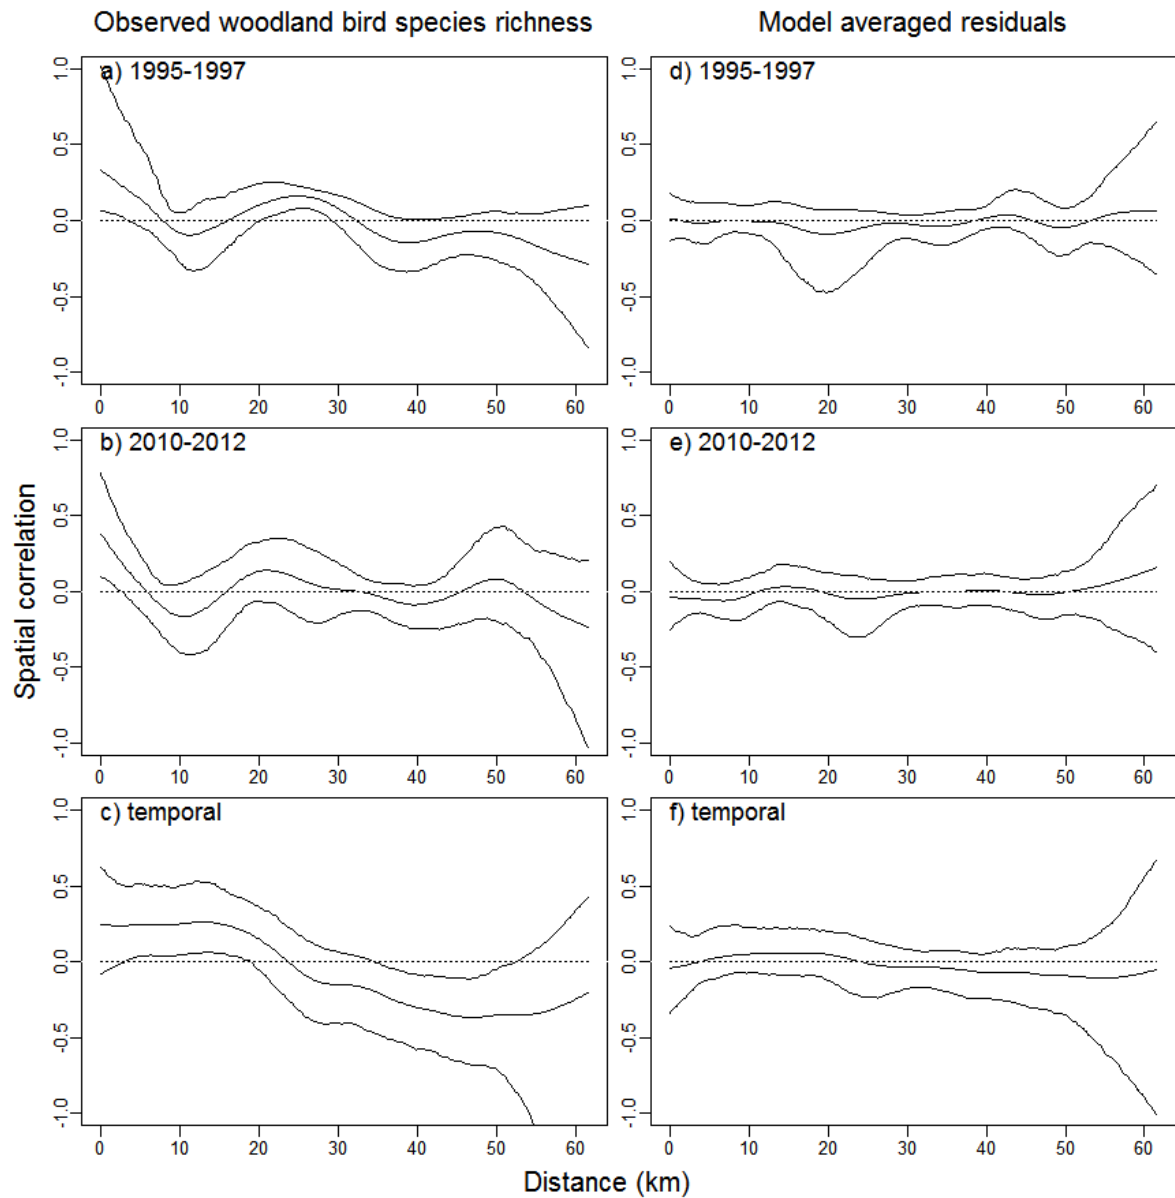

**Figure S3.** Spline correlograms describing spatial autocorrelation for woodland bird species richness and for the residuals of models relating species richness to landscape variables (Tables S4 – S6). Separate correlograms are presented for 1995-97 (a, d), 2010-12 (b, e), and temporal variation (c, f). Lines represent the estimate (in the middle) and the 95% confidence envelopes (external lines) using 1000 bootstrap resamples (Bjørnstad & Falck 2001).

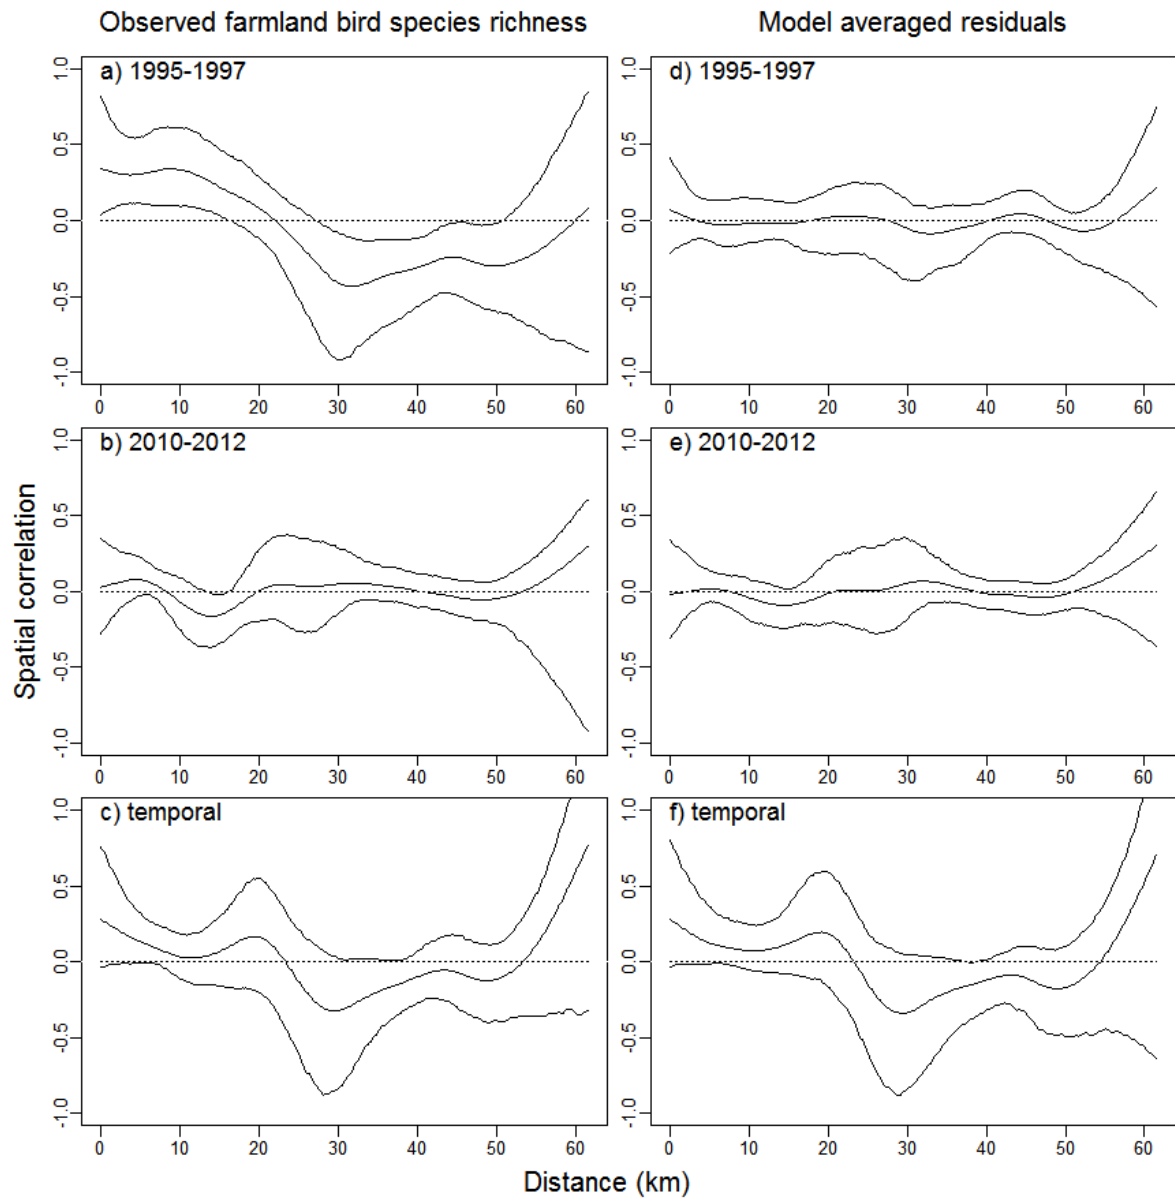

**Figure S4.** Spline correlograms describing spatial autocorrelation for farmland bird species richness and for the residuals of models relating species richness to landscape variables (Tables S4 – S6). Separate correlograms are presented for 1995-97 (a, d), 2010-12 (b, e), and temporal variation (c, f). Lines represent the estimate (in the middle) and the 95% confidence envelopes (external lines) using 1000 bootstrap resamples (Bjørnstad & Falck 2001).

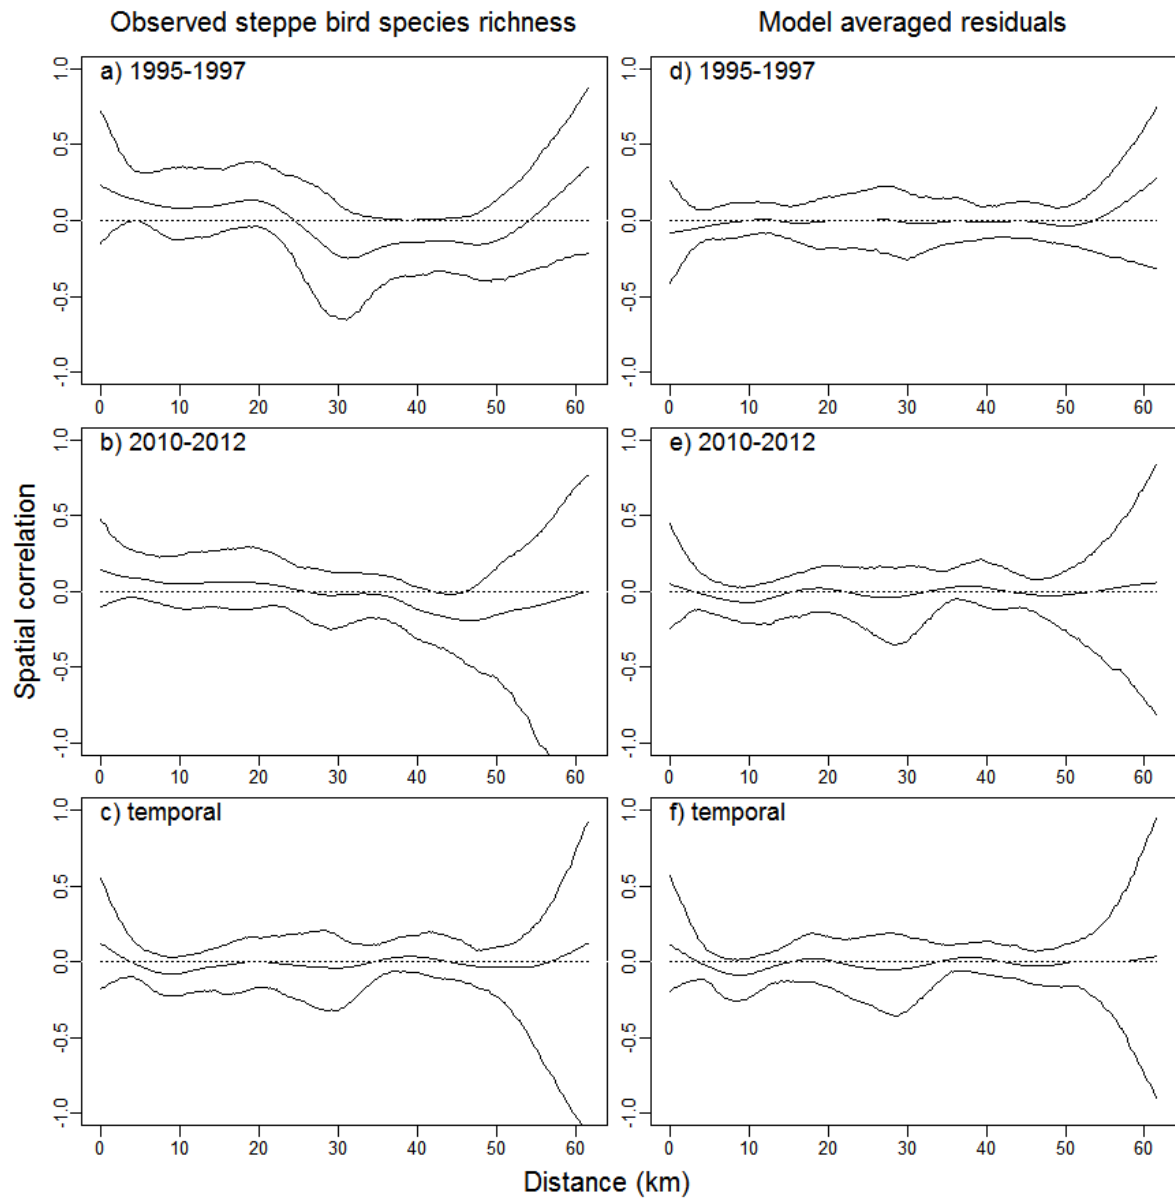

**Figure S5.** Spline correlograms describing spatial autocorrelation for steppe bird species richness and for the residuals of models relating species richness to landscape variables (Tables S4 – S6). Separate correlograms are presented for 1995-97 (a, d), 2010-12 (b, e), and temporal variation (c, f). Lines represent the estimate (in the middle) and the 95% confidence envelopes (external lines) using 1000 bootstrap resamples (Bjørnstad & Falck 2001).

## Supporting references

- BirdLife International (2004). *Birds in the European Union: a status assessment*. Wageningen, The Netherlands: BirdLife International.
- Bjørnstad, O. N., & Falck, W. (2001). Nonparametric spatial covariance functions: estimation and testing. *Environmental and Ecological Statistics*, *8*, 53-70. doi:10.1023/A:1009601932481
- Cade, B. S. (2015). Model averaging and muddled multimodel inferences. *Ecology*, *96*, 2370-2382. doi:10.1890/14-1639.1
- Delgado, A., & Moreira, F. (2000). Bird assemblages of an Iberian cereal steppe. *Agriculture, Ecosystems & Environment*, *78*, 65-76. doi:10.1016/S0167-8809(99)00114-0
- EBCC (2012). <http://www.ebcc.info/index.php?ID=294>
- Ehrlich, P.R., Dobkin, D.S., Wheye, D., & Pimm, S.L. (1994). *The Birdwatcher's Handbook: a guide to the Natural History of the Birds of Britain and Europe*. Oxford University Press, Oxford.
- Equipa Atlas (2008). *Atlas das Aves Nidificantes em Portugal (1999-2005)*. Instituto da Conservação da Natureza e da Biodiversidade, Sociedade Portuguesa para o Estudo das Aves, Parque Natural da Madeira e Secretaria Regional do Ambiente e do Mar. Assírio & Alvim, Lisboa.
- Moreira, F. (1999). Relationships between vegetation structure and breeding bird densities in fallow cereal steppes in Castro Verde, Portugal. *Bird Study*, *46*, 309-318. doi:10.1080/00063659909461144
- Reino, L., Beja, P., Osborne, P.E., Morgado, R., Fabião, A., & Rotenberry, J.T. (2009). Distance to edges, edge contrast and landscape fragmentation: Interactions affecting farmland birds around forest plantations. *Biological Conservation*, *142*, 824-838. doi:10.1016/j.biocon.2008.12.011
- Reino, L., Porto, M., Morgado, R., Moreira, F., Fabião, A., Santana, J., Delgado, A., Gordinho, L., Cal, J., & Beja, P. (2010). Effects of changed grazing regimes and habitat fragmentation on Mediterranean grassland birds. *Agriculture, Ecosystems & Environment*, *138*, 27-34. doi:10.1016/j.agee.2010.03.013
- Stoate, C., Borralho, R., & Araújo, M. (2000). Factors affecting corn bunting *Miliaria calandra* abundance in a Portuguese agricultural landscape. *Agriculture, Ecosystems & Environment*, *77*, 219-226. doi:10.1016/S0167-8809(99)00101-2
- Suárez, F., Naveso, M.A., & de Juana, E. (1997). Farming in the drylands of Spain: birds of the pseudosteppes. In Farming and Birds in Europe. In: *The Common Agricultural Policy and its implications for bird conservation* (eds. Pain, D. & Pienkowski, M.W.), Academic Press, San Diego, pp. 297-330.
